# Supplementary material
Source: PubMed Central journal article supplement (PMC6613984)
Supplement: NIHMS1530900-supplement-1.pdf [file NIHMS1530900-supplement-1.pdf]

## Supplementary Material

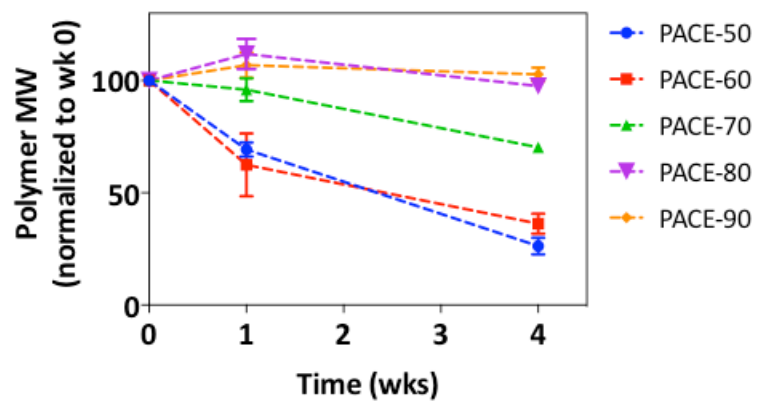

**Supplemental Figure 1: PACE polymer degradation in buffer.** Polymers were incubated in pH 7.4 Tris-EDTA buffer on a 37°C on a shaker for 1 to 4 weeks. After incubation, polymers were washed and lyophilized for 48 hours. Polymer molecular weight was measured using Gel Permeation Chromatography (GPC).

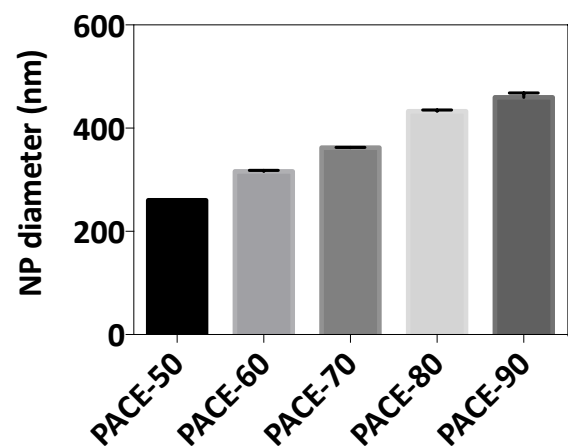

**Supplemental Figure 2: Hydrodynamic diameter of siRNA-loaded PACE NPs.** NPs were dissolved in PBS and diameter was measured using dynamic light scattering (Malvern).

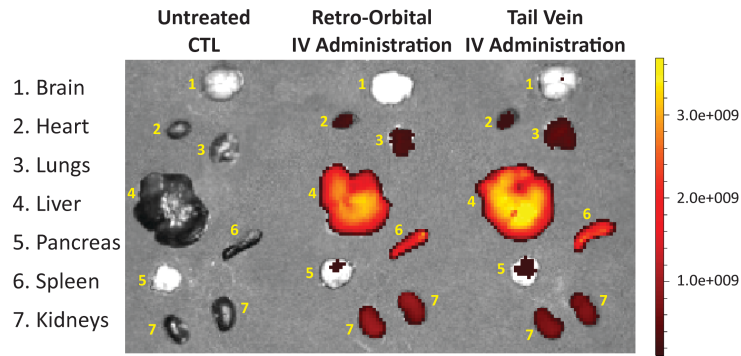

**Supplemental Figure 3: Nanoparticle biodistribution following retro-orbital and tail vein IV administration.** DiD-loaded NPs in PBS were injected intravenously into mice via either retro-orbital or tail vein administration. After 48 hours, organs were harvested and imaged using an IVIS Spectrum In Vivo Imaging System (Perkin Elmer).

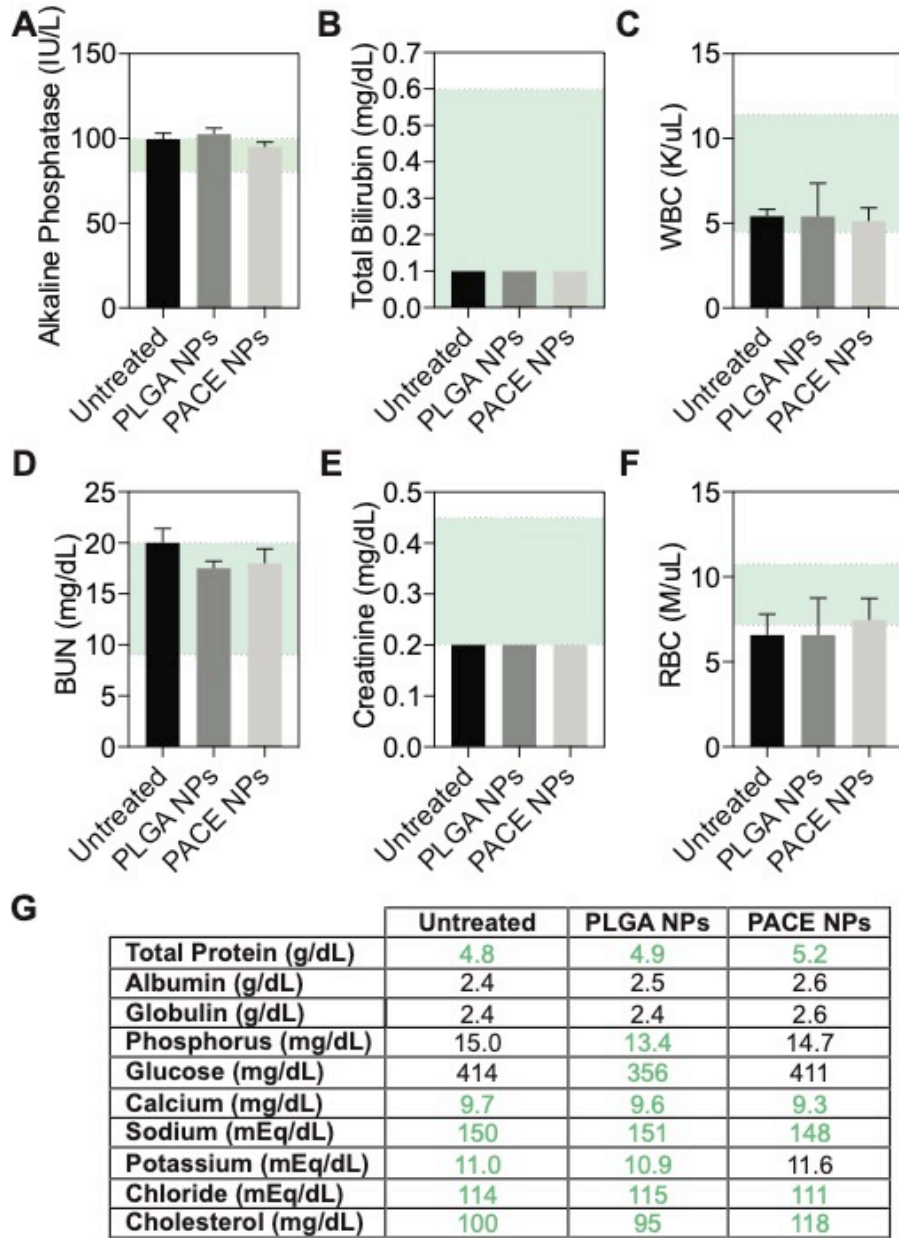

**Supplemental Figure 4: PACE NPs are non-toxic following *in vivo* IV administration.** (A)-(G) Blood serum chemistry analyses from C57BL/6 mice that were either untreated or treated with 1 mg of poly(lactic-co-glycolic acid) (PLGA) NPs or PACE NPs 24 hours after treatment. Green regions in (A)-(F) indicate standard ranges for the C57BL/6 strain, and green text in (G) indicates that the values are in the normal range.
